# Supplementary material for: Age-Related Differences in Influenza B Infection by Lineage in a Community-Based Sentinel System, 2010–2011 to 2015–2016, Canada
Source: PubMed Central journal article supplement — J Infect Dis. 2017 Aug 7;216(6):697–702. doi: 10.1093/infdis/jix393 (PMC5853978; doi:10.1093/infdis/jix393), 2017-08-07
Supplement: jix393_suppl_supplement_figure_1.pdf [file jix393_suppl_supplement_figure_1.pdf]

**Supplemental Figure 1a.** Percent distribution of influenza B(Victoria) cases and test-negative controls by single-year age group\* stratified by vaccination status,† Canadian SPSN, 2010-11 to 2015-16

**a B(Victoria)**

**Unvaccinated**

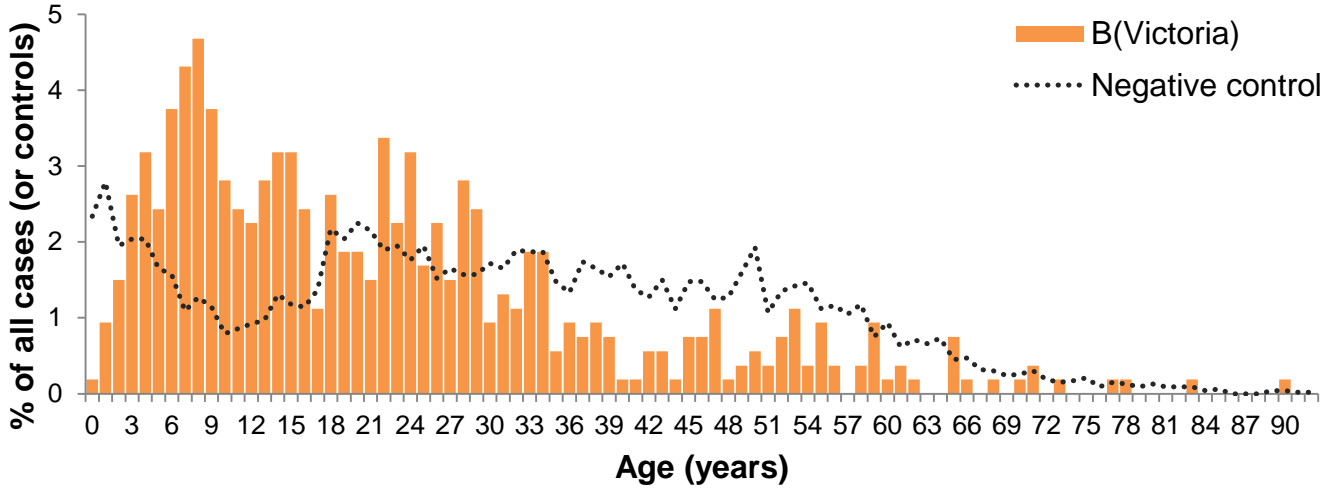

**Vaccinated**

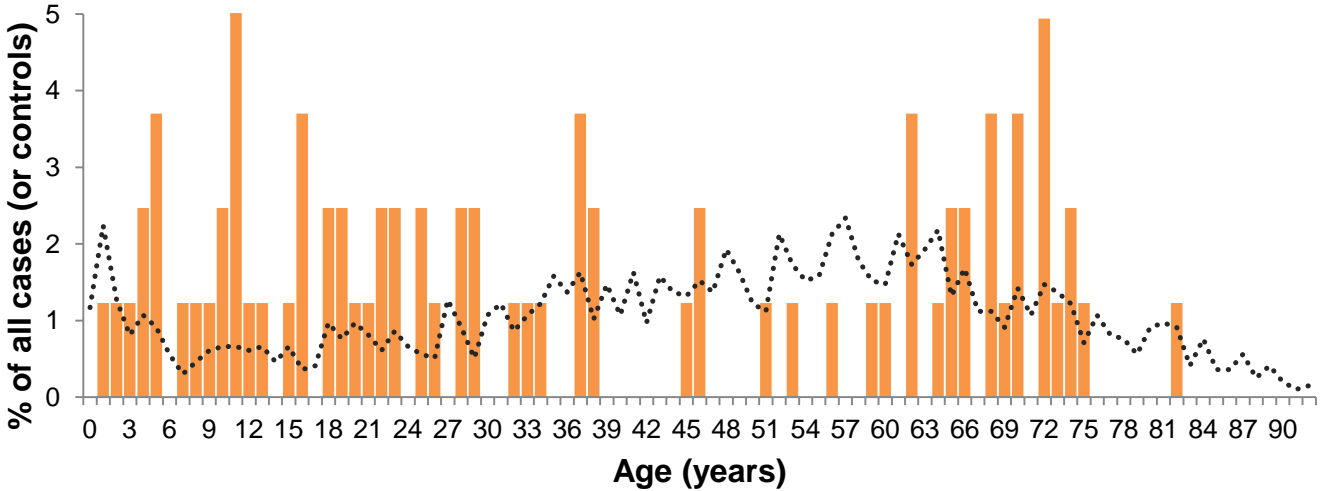

\*The percentage of all B(Victoria) cases belonging to a given age (in years) is displayed as a bar graph; the same information for test-negative controls is superimposed as a dotted line for comparison purposes to indicate the sampling distribution by age in the overall SPSN sample

† Vaccination status defined as receipt of current season's influenza vaccine ≥2 weeks before influenza-like illness (ILI) onset. Participants vaccinated <2 weeks since ILI onset and those with unknown vaccination status or timing were included in the primary analysis but are excluded from Supplemental Figure 1.

**Supplemental Figure 1b.** Percent distribution of influenza B(Yamagata) cases and test-negative controls by single-year age group\* stratified by vaccination status,† Canadian SPSN, 2010-11 to 2015-16

## b B(Yamagata)

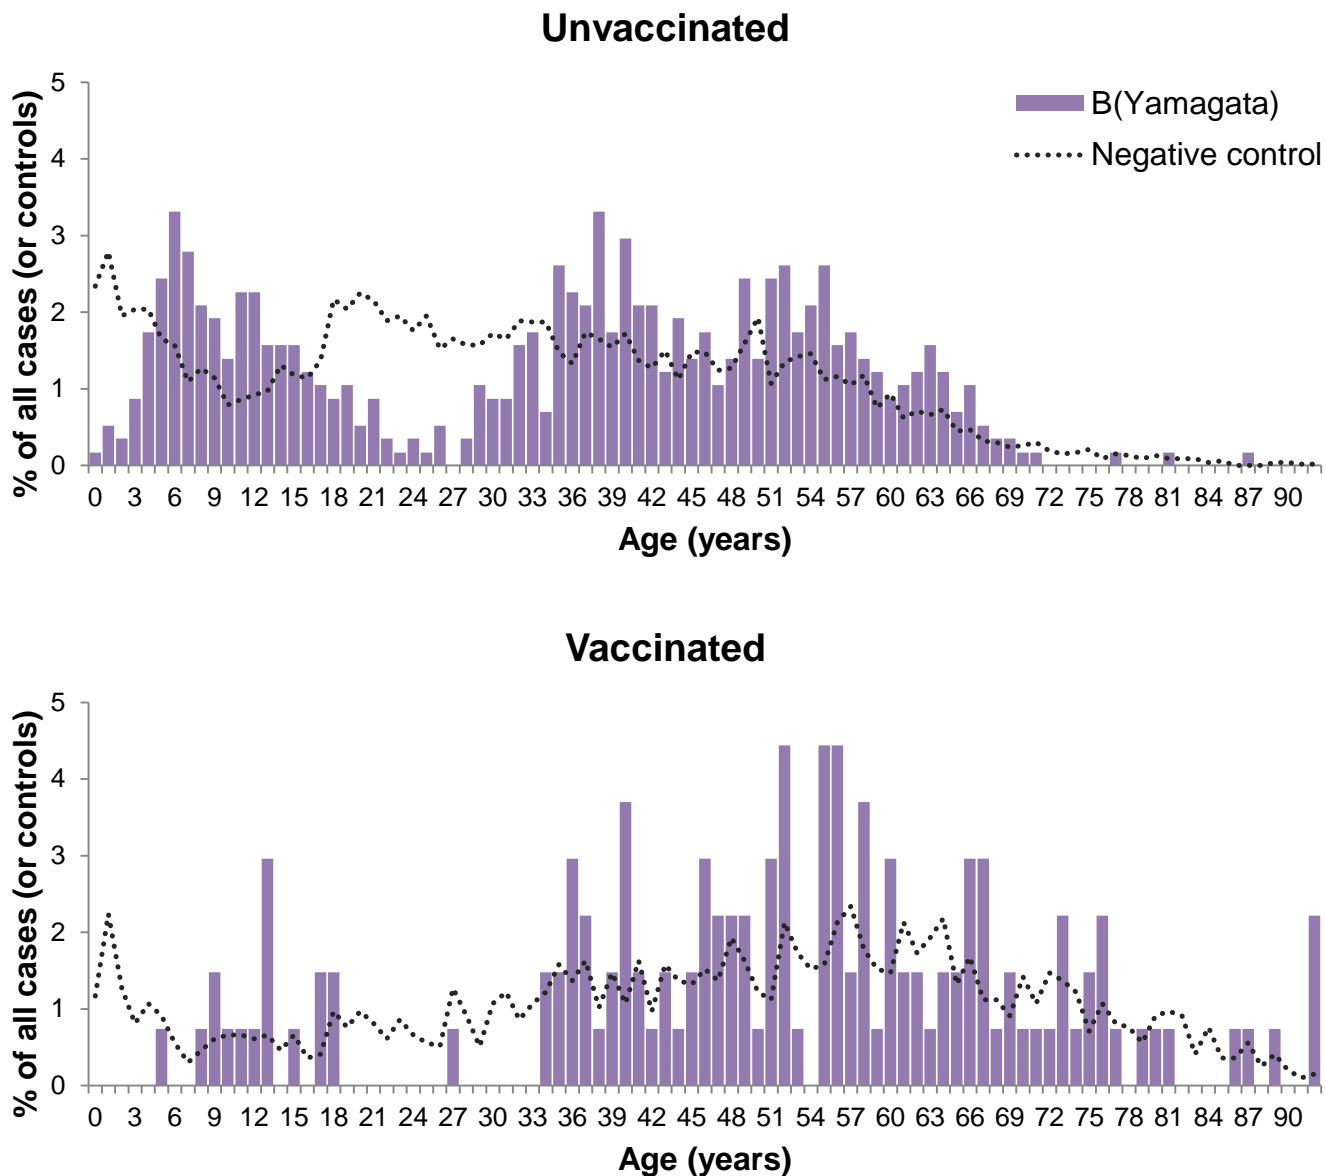

\*The percentage of all B(Victoria) cases belonging to a given age (in years) is displayed as a bar graph; the same information for test-negative controls is superimposed as a dotted line for comparison purposes to indicate the sampling distribution by age in the overall SPSN sample

† Vaccination status defined as receipt of current season's influenza vaccine  $\geq 2$  weeks before influenza-like illness (ILI) onset. Participants vaccinated  $< 2$  weeks since ILI onset and those with unknown vaccination status or timing were included in the primary analysis but are excluded from Supplemental Figure 1.
