# Supplementary material for: Age-Related Differences in Influenza B Infection by Lineage in a Community-Based Sentinel System, 2010–2011 to 2015–2016, Canada
Source: PubMed Central journal article supplement — J Infect Dis. 2017 Aug 7;216(6):697–702. doi: 10.1093/infdis/jix393 (PMC5853978; doi:10.1093/infdis/jix393), 2017-08-07
Supplement: jix393_suppl_supplement_table_2.pdf [file jix393_suppl_supplement_table_2.pdf]

**Supplementary Table 2.** Detection rates and percent distribution by age group, influenza B outcome and season, Canadian SPSN, 2010-11 to 2015-16

| Outcome                                          | Age group (years), n (row %, column %) |               |               |               |               |              | Total        |
|--------------------------------------------------|----------------------------------------|---------------|---------------|---------------|---------------|--------------|--------------|
|                                                  | 0-4                                    | 5-19          | 20-29         | 30-39         | 40-64         | ≥65          |              |
| <b>All seasons combined (2010-11 to 2015-16)</b> |                                        |               |               |               |               |              |              |
| B(Victoria)                                      | 53 (8, 5)                              | 265 (41, 12)  | 139 (22, 8)   | 71 (11, 4)    | 77 (12, 2)    | 34 (5, 3)    | 639          |
| B(Yamagata)                                      | 21 (3, 2)                              | 179 (24, 8)   | 26 (4, 2)     | 119 (16, 6)   | 329 (45, 8)   | 59 (8, 6)    | 733          |
| Unknown lineage                                  | 10 (5, 1)                              | 60 (27, 3)    | 34 (15, 2)    | 29 (13, 2)    | 71 (32, 2)    | 17 (8, 2)    | 221          |
| Influenza A <sup>1</sup>                         | 258 (8, 25)                            | 526 (16, 24)  | 442 (14, 26)  | 564 (18, 30)  | 1150 (36, 29) | 256 (8, 24)  | 3196         |
| Negative control                                 | 700 (10, 67)                           | 1137 (16, 52) | 1042 (15, 62) | 1080 (15, 58) | 2340 (33, 59) | 701 (10, 66) | 7000         |
| <b>Total</b>                                     | <b>1042</b>                            | <b>2167</b>   | <b>1683</b>   | <b>1863</b>   | <b>3967</b>   | <b>1067</b>  | <b>11789</b> |
| <b>2010-11 season</b>                            |                                        |               |               |               |               |              |              |
| B(Victoria)                                      | 11 (9, 5)                              | 67 (53, 17)   | 23 (18, 8)    | 13 (10, 4)    | 7 (6, 1)      | 5 (4, 6)     | 126          |
| B(Yamagata)                                      | 0 (0, 0)                               | 0 (0, 0)      | 0 (0, 0)      | 1 (33, 0)     | 2 (67, 0)     | 0 (0, 0)     | 3            |
| Unknown lineage                                  | 6 (7, 3)                               | 36 (42, 9)    | 18 (21, 6)    | 9 (10, 3)     | 16 (19, 3)    | 1 (1, 1)     | 86           |
| Influenza A                                      | 62 (11, 29)                            | 86 (15, 22)   | 90 (16, 29)   | 120 (21, 38)  | 179 (32, 32)  | 27 (5, 31)   | 564          |
| Negative control                                 | 135 (12, 63)                           | 201 (18, 52)  | 175 (16, 57)  | 171 (16, 54)  | 363 (33, 64)  | 54 (5, 62)   | 1099         |
| <b>Total</b>                                     | <b>214</b>                             | <b>388</b>    | <b>305</b>    | <b>314</b>    | <b>594</b>    | <b>59</b>    | <b>1878</b>  |
| <b>2011-12 season</b>                            |                                        |               |               |               |               |              |              |
| B(Victoria)                                      | 10 (9, 7)                              | 39 (33, 12)   | 28 (24, 11)   | 16 (14, 6)    | 19 (16, 3)    | 5 (4, 4)     | 117          |
| B(Yamagata)                                      | 4 (4, 3)                               | 32 (29, 10)   | 1 (1, 0)      | 19 (17, 7)    | 48 (43, 9)    | 8 (7, 6)     | 112          |
| Unknown lineage                                  | 2 (10, 1)                              | 2 (10, 1)     | 4 (20, 2)     | 4 (20, 2)     | 6 (30, 1)     | 2 (10, 1)    | 20           |
| Influenza A                                      | 16 (7, 12)                             | 47 (20, 15)   | 44 (18, 18)   | 40 (17, 15)   | 84 (35, 15)   | 9 (4, 7)     | 240          |
| Negative control                                 | 104 (9, 76)                            | 204 (17, 63)  | 170 (14, 69)  | 187 (16, 70)  | 395 (34, 72)  | 114 (10, 83) | 1174         |
| <b>Total</b>                                     | <b>136</b>                             | <b>324</b>    | <b>247</b>    | <b>266</b>    | <b>552</b>    | <b>138</b>   | <b>1663</b>  |
| <b>2012-13 season</b>                            |                                        |               |               |               |               |              |              |
| B(Victoria)                                      | 0 (0, 0)                               | 18 (36, 6)    | 15 (30, 6)    | 3 (6, 1)      | 7 (14, 1)     | 7 (14, 4)    | 50           |
| B(Yamagata)                                      | 5 (5, 4)                               | 42 (40, 15)   | 4 (4, 2)      | 12 (12, 5)    | 36 (35, 7)    | 5 (5, 3)     | 104          |
| Unknown lineage                                  | 0 (0, 0)                               | 3 (19, 1)     | 0 (0, 0)      | 4 (25, 2)     | 7 (44, 1)     | 2 (13, 1)    | 16           |
| Influenza A                                      | 31 (6, 27)                             | 105 (21, 36)  | 81 (16, 32)   | 80 (16, 33)   | 172 (34, 32)  | 43 (8, 26)   | 512          |
| Negative control                                 | 80 (9, 69)                             | 120 (13, 42)  | 153 (17, 60)  | 145 (16, 59)  | 316 (34, 59)  | 108 (12, 65) | 922          |
| <b>Total</b>                                     | <b>116</b>                             | <b>288</b>    | <b>253</b>    | <b>244</b>    | <b>538</b>    | <b>165</b>   | <b>1604</b>  |
| <b>2013-14 season</b>                            |                                        |               |               |               |               |              |              |
| B(Victoria)                                      | 0 (0, 0)                               | 1 (20, 0)     | 2 (40, 1)     | 0 (0, 0)      | 1 (20, 0)     | 1 (20, 1)    | 5            |
| B(Yamagata)                                      | 4 (2, 3)                               | 44 (21, 16)   | 10 (5, 4)     | 30 (14, 9)    | 104 (50, 16)  | 16 (8, 10)   | 208          |
| Unknown lineage                                  | 0 (0, 0)                               | 4 (19, 1)     | 0 (0, 0)      | 2 (10, 1)     | 9 (43, 1)     | 6 (29, 4)    | 21           |
| Influenza A                                      | 38 (8, 28)                             | 57 (12, 21)   | 69 (15, 27)   | 93 (20, 29)   | 181 (39, 27)  | 23 (5, 14)   | 461          |
| Negative control                                 | 94 (9, 69)                             | 168 (15, 61)  | 171 (15, 68)  | 193 (17, 61)  | 367 (33, 55)  | 113 (10, 71) | 1106         |
| <b>Total</b>                                     | <b>136</b>                             | <b>274</b>    | <b>252</b>    | <b>318</b>    | <b>662</b>    | <b>159</b>   | <b>1801</b>  |
| <b>2014-15 season</b>                            |                                        |               |               |               |               |              |              |
| B(Victoria)                                      | 1 (14, 1)                              | 2 (29, 1)     | 2 (29, 1)     | 2 (29, 1)     | 0 (0, 0)      | 0 (0, 0)     | 7            |
| B(Yamagata)                                      | 7 (3, 4)                               | 40 (19, 10)   | 6 (3, 2)      | 36 (17, 12)   | 104 (49, 13)  | 19 (9, 7)    | 212          |
| Unknown lineage                                  | 1 (3, 1)                               | 6 (16, 2)     | 1 (3, 0)      | 6 (16, 2)     | 21 (55, 3)    | 3 (8, 1)     | 38           |
| Influenza A <sup>1</sup>                         | 42 (6, 22)                             | 137 (20, 36)  | 67 (10, 26)   | 91 (14, 29)   | 232 (35, 30)  | 101 (15, 37) | 670          |
| Negative control                                 | 138 (11, 73)                           | 199 (16, 52)  | 177 (14, 70)  | 176 (14, 57)  | 429 (34, 55)  | 151 (12, 55) | 1270         |
| <b>Total</b>                                     | <b>189</b>                             | <b>384</b>    | <b>253</b>    | <b>311</b>    | <b>786</b>    | <b>274</b>   | <b>2197</b>  |
| <b>2015-16 season</b>                            |                                        |               |               |               |               |              |              |
| B(Victoria)                                      | 31 (9, 12)                             | 138 (41, 27)  | 69 (21, 19)   | 37 (11, 9)    | 43 (13, 5)    | 16 (5, 7)    | 334          |
| B(Yamagata)                                      | 1 (1, 0)                               | 21 (22, 4)    | 5 (5, 1)      | 21 (22, 5)    | 35 (37, 4)    | 11 (12, 5)   | 94           |
| Unknown lineage                                  | 1 (3, 0)                               | 9 (23, 2)     | 11 (28, 3)    | 4 (10, 1)     | 12 (30, 1)    | 3 (8, 1)     | 40           |
| Influenza A <sup>1</sup>                         | 69 (9, 27)                             | 94 (13, 19)   | 91 (12, 24)   | 140 (19, 34)  | 302 (40, 35)  | 53 (7, 22)   | 749          |
| Negative control                                 | 149 (10, 59)                           | 245 (17, 48)  | 196 (14, 53)  | 208 (15, 51)  | 470 (33, 55)  | 161 (11, 66) | 1429         |
| <b>Total</b>                                     | <b>251</b>                             | <b>507</b>    | <b>372</b>    | <b>410</b>    | <b>862</b>    | <b>244</b>   | <b>2646</b>  |

<sup>1</sup> Outcomes are mutually exclusive. For influenza A and B co-infections (n=7; 2 in 2014-15 and 5 in 2015-16), specimens were counted as part of influenza B (Victoria or Yamagata) outcomes but excluded from influenza A.
