# Supplementary material for: Age-Related Differences in Influenza B Infection by Lineage in a Community-Based Sentinel System, 2010–2011 to 2015–2016, Canada
Source: PubMed Central journal article supplement — J Infect Dis. 2017 Aug 7;216(6):697–702. doi: 10.1093/infdis/jix393 (PMC5853978; doi:10.1093/infdis/jix393), 2017-08-07
Supplement: jix393_suppl_supplement_table_3.pdf [file jix393_suppl_supplement_table_3.pdf]

**Supplementary Table 3.** Detection rates and percent distribution by age group, influenza B outcome and vaccination status,<sup>1</sup> Canadian SPSN, 2010-11 to 2015-16

| Outcome                                                                     | Age group (years), n (row %, column %) |              |              |              |               |              | Total       |
|-----------------------------------------------------------------------------|----------------------------------------|--------------|--------------|--------------|---------------|--------------|-------------|
|                                                                             | 0-4                                    | 5-19         | 20-29        | 30-39        | 40-64         | ≥65          |             |
| <b>Unvaccinated participants, all seasons combined (2010-11 to 2015-16)</b> |                                        |              |              |              |               |              |             |
| B(Victoria)                                                                 | 45 (8, 6)                              | 233 (44, 13) | 122 (23, 9)  | 59 (11, 4)   | 61 (11, 2)    | 14 (3, 4)    | 534         |
| B(Yamagata)                                                                 | 21 (4, 3)                              | 157 (27, 9)  | 25 (4, 2)    | 102 (18, 7)  | 247 (43, 10)  | 22 (4, 7)    | 574         |
| Unknown lineage                                                             | 7 (4, 1)                               | 50 (29, 3)   | 31 (18, 2)   | 20 (12, 1)   | 55 (32, 2)    | 7 (4, 2)     | 170         |
| Influenza A <sup>2</sup>                                                    | 211 (9, 26)                            | 450 (18, 25) | 392 (16, 28) | 469 (19, 33) | 824 (34, 32)  | 95 (4, 28)   | 2441        |
| Negative control                                                            | 520 (11, 65)                           | 907 (19, 50) | 851 (18, 60) | 780 (17, 55) | 1407 (30, 54) | 197 (4, 59)  | 4662        |
| <b>Total</b>                                                                | <b>804</b>                             | <b>1797</b>  | <b>1421</b>  | <b>1430</b>  | <b>2594</b>   | <b>335</b>   | <b>8381</b> |
| <b>Vaccinated participants, all seasons combined (2010-11 to 2015-16)</b>   |                                        |              |              |              |               |              |             |
| B(Victoria)                                                                 | 5 (6, 3)                               | 23 (28, 8)   | 13 (16, 6)   | 8 (10, 2)    | 12 (15, 1)    | 20 (25, 3)   | 81          |
| B(Yamagata)                                                                 | 0 (0, 0)                               | 16 (12, 6)   | 1 (1, 0)     | 14 (10, 4)   | 69 (51, 6)    | 35 (26, 5)   | 135         |
| Unknown lineage                                                             | 1 (3, 1)                               | 7 (18, 2)    | 3 (8, 1)     | 7 (18, 2)    | 12 (31, 1)    | 9 (23, 1)    | 39          |
| Influenza A <sup>2</sup>                                                    | 23 (4, 15)                             | 58 (9, 21)   | 36 (6, 18)   | 78 (12, 22)  | 289 (46, 24)  | 145 (23, 22) | 629         |
| Negative control                                                            | 129 (7, 82)                            | 178 (9, 63)  | 151 (8, 74)  | 246 (13, 70) | 805 (41, 68)  | 459 (23, 69) | 1968        |
| <b>Total</b>                                                                | <b>158</b>                             | <b>282</b>   | <b>204</b>   | <b>353</b>   | <b>1187</b>   | <b>668</b>   | <b>2852</b> |

<sup>1</sup> Vaccination status defined as receipt of current season's influenza vaccine ≥2 weeks before influenza-like illness (ILI) onset. Participants vaccinated <2 weeks since ILI onset and those with unknown vaccination status or timing were included in the primary analysis but are excluded from Supplemental Table 3.

<sup>2</sup> Outcomes are mutually exclusive. For influenza A and B co-infections (n=7; 2 in 2014-15 and 5 in 2015-16), specimens were counted as part of influenza B (Victoria or Yamagata) outcomes but excluded from influenza A.
